# Supplementary material
Source: MDPI journal article supplement (https://www.mdpi.com/2673-8937/2/3/34)
Supplement: s1 [file s1]

**Table S1.** Baseline characteristics of patients and bacterial identification

| <b>All patients (n=170)</b>                |                 |
|--------------------------------------------|-----------------|
| <i>Demographic data</i>                    |                 |
| Male/female, <i>n (%)</i> / <i>n (%)</i>   | 81 (48)/89 (52) |
| Age (years), median (IQR)                  | 71 (58-80)      |
| ICU admission, <i>n (%)</i>                | 13 (7.6)        |
| Hospital acquired infections, <i>n (%)</i> | 83 (48.8%)      |
| <i>Sources of infection, n (%)</i>         |                 |
| Urinary tract                              | 81 (47.7%)      |
| Intra-abdominal                            | 41 (24.1%)      |
| Primary bacteraemia                        | 12 (7.1%)       |
| Catheter related                           | 11 (6.5%)       |
| Respiratory tract                          | 11 (6.5%)       |
| Skin and soft tissue                       | 6 (3.5%)        |
| Febrile neutropenia                        | 5 (2.9%)        |
| Maternal-fetal                             | 1 (0.6%)        |
| Neuromeningeal                             | 1 (0.6%)        |
| Bone and joint infection                   | 1 (0.6%)        |
| Monobacterial infection, <i>n (%)</i>      | 158 (93)        |
| Polybacterial infection, <i>n (%)</i>      | 12 (7)          |
